# Supplementary material for: Green-emitting AIEgen for instantaneous fluorescence switch-off detection of uranyl ions in environmental water samples
Source: Royal Society of Chemistry journal article supplement (doi:10.1039/d5nj00126a), 2025-01-01
Supplement: d5nj00126a1.pdf [file d5nj00126a1.pdf]

## Green-emitting AIEgen for instantaneous fluorescent switch-off detection of uranyl ions in environmental water samples

Kanishk Bhardwaj<sup>a</sup>, Ritambhara Jangir<sup>a</sup>, Arup Kumar Ghosh<sup>a</sup>, Bigyan R Jali<sup>b</sup>, Ashok Kumar SK<sup>c</sup> and Suban K. Sahoo<sup>a,\*</sup>

<sup>a</sup> Department of Chemistry, Sardar Vallabhbhai National Institute Technology, Surat-395007, Gujarat, India.

<sup>b</sup> Department of Chemistry, Veer Surendra Sai University of Technology, Burla, Sambalpur-768018, Odisha, India.

<sup>c</sup> Department of Chemistry, School of Advance Sciences, Vellore Institute of Technology, Vellore, 632014, Tamil Nadu, India.

\*E-mail (Dr. Sahoo): sks@chem.svnit.ac.in.

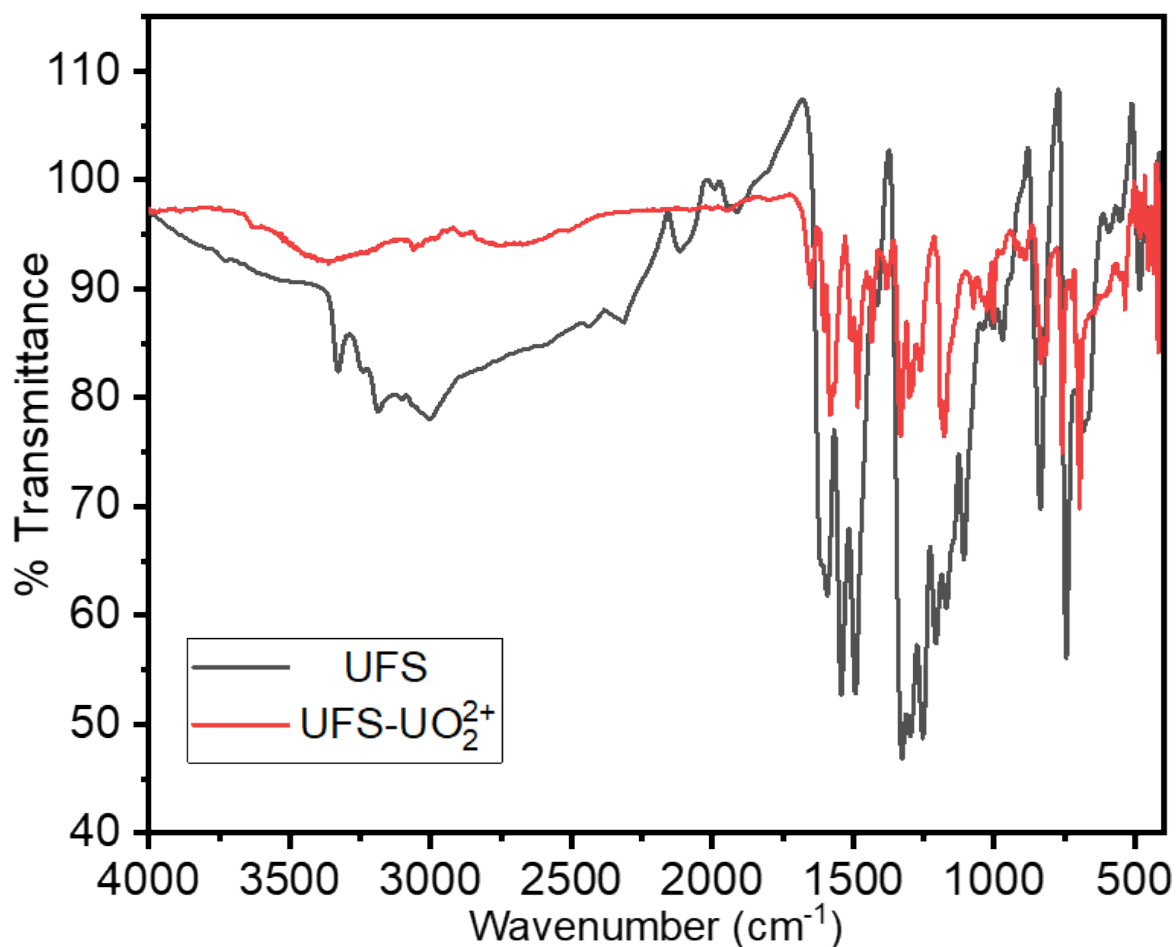

Fig. S1. FT-IR spectra of UFS and UFS-UO<sub>2</sub><sup>2+</sup> complex.

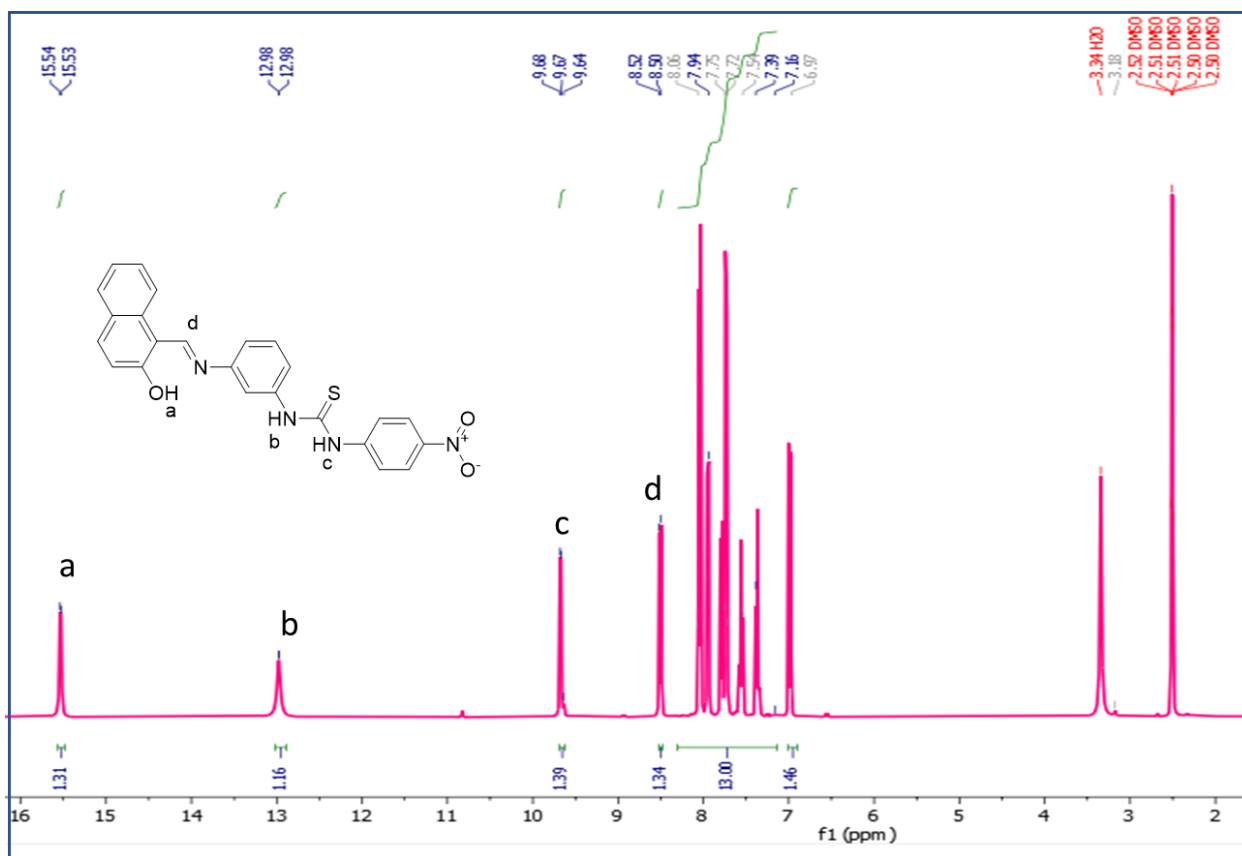

Fig. S2. <sup>1</sup>H NMR spectrum of UFS in DMSO-*d*<sub>6</sub>.

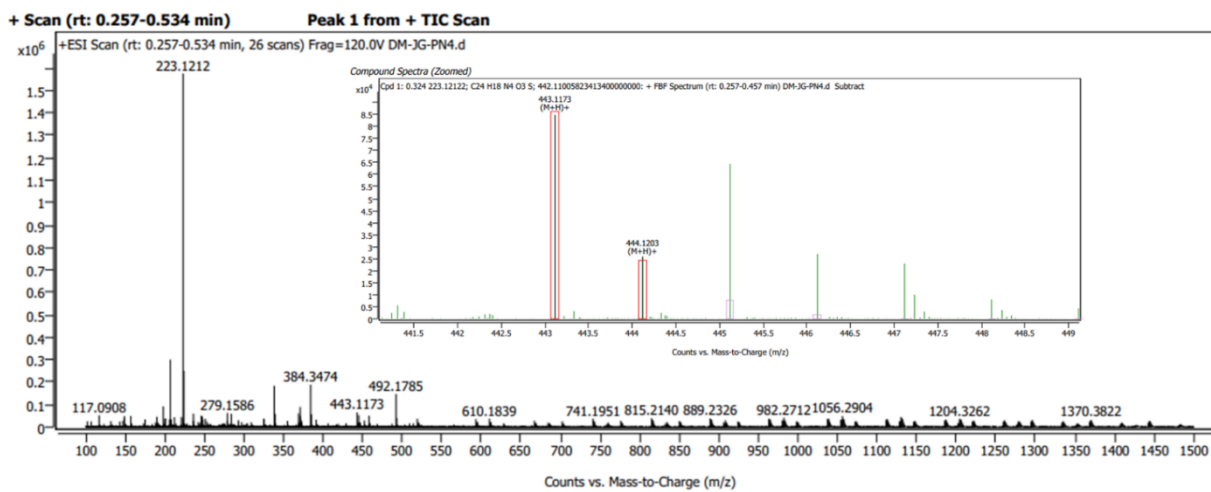

Fig. S3. Mass spectrum of UFS.

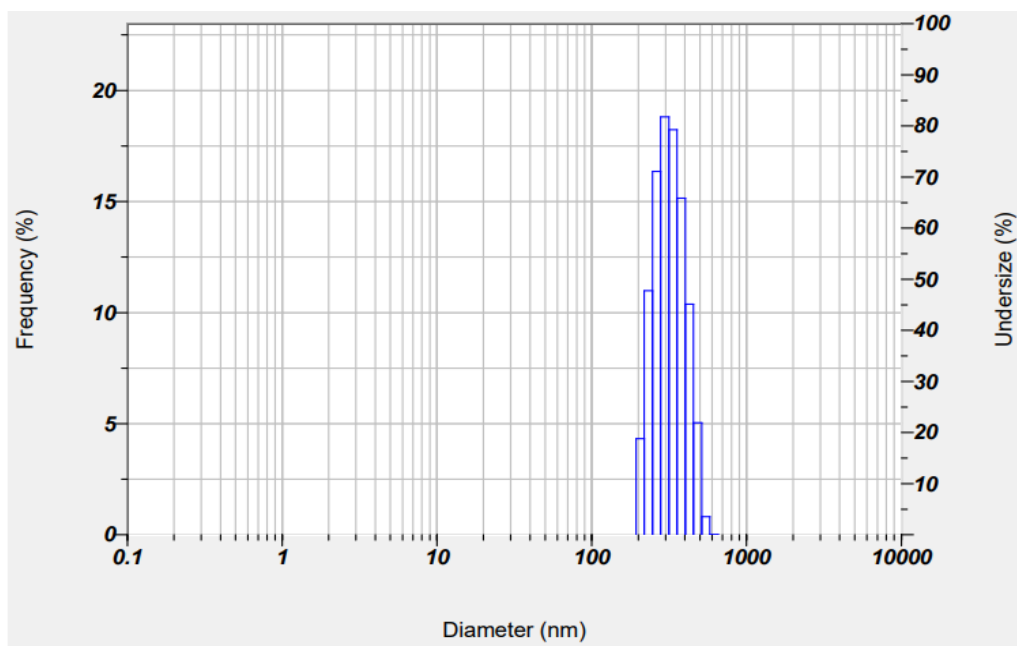

**Fig. S4.** DLS of AIEgen UFS ( $5 \times 10^{-5}$  M) in DMSO containing  $f_w = 95\%$ .

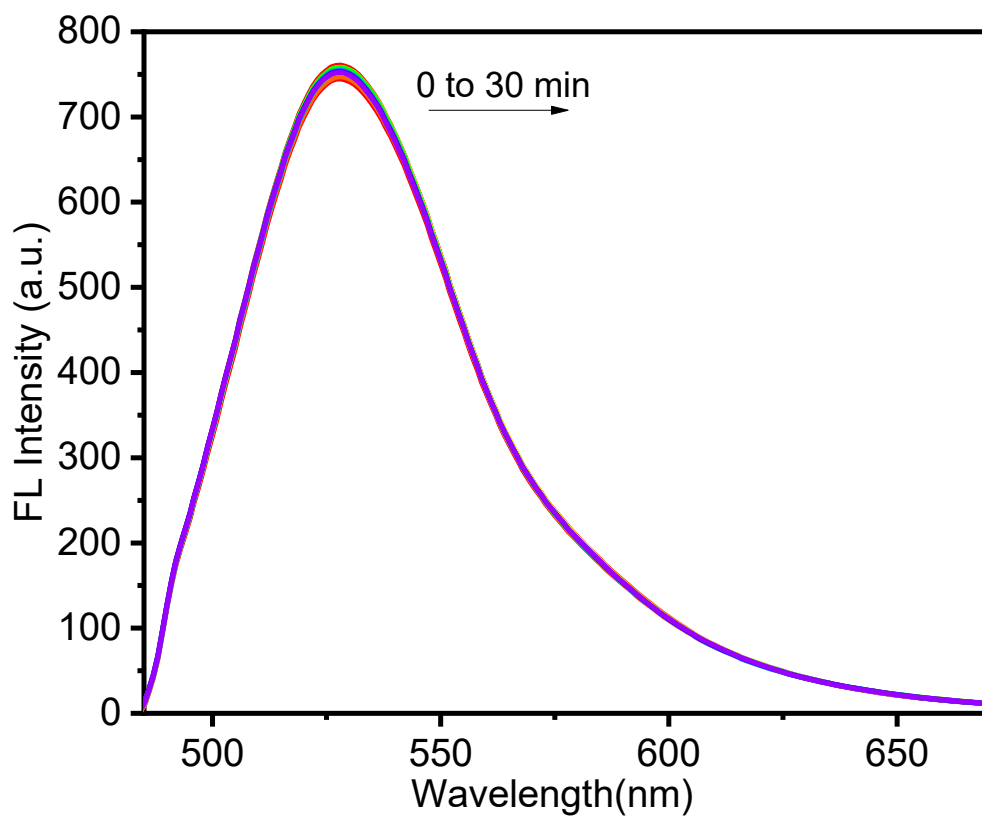

**Fig. S5.** Time-dependent fluorescence spectra of AIEgen UFS ( $5 \times 10^{-5}$  M) in DMSO containing  $f_w = 95\%$ .

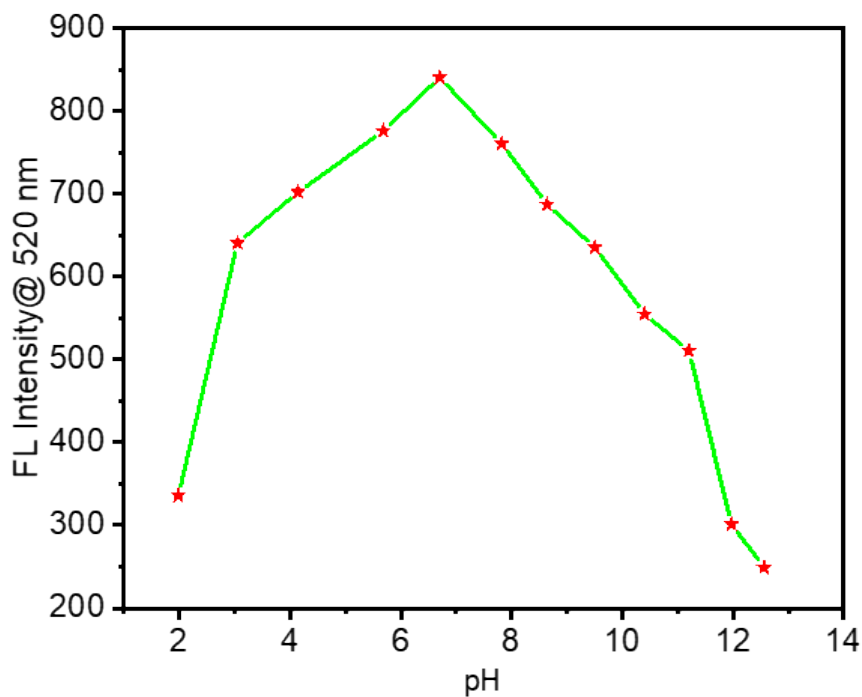

**Fig. S6.** Fluorescence spectral changes of AIEgen UFS ( $5 \times 10^{-5}$  M) in DMSO:H<sub>2</sub>O ( $f_w = 95\%$ ) at different pH.

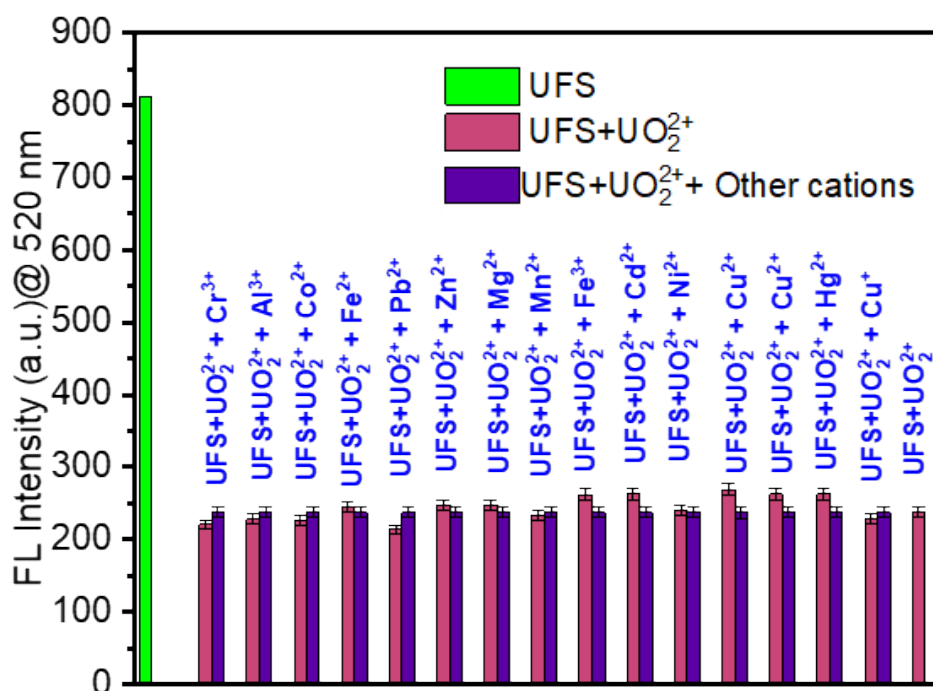

**Fig. S7.** The bar representation of selectivity and anti-interference test of the AIEgen UFS for detecting UO<sub>2</sub><sup>2+</sup> in H<sub>2</sub>O/DMSO ( $f_w = 95\%$ ).

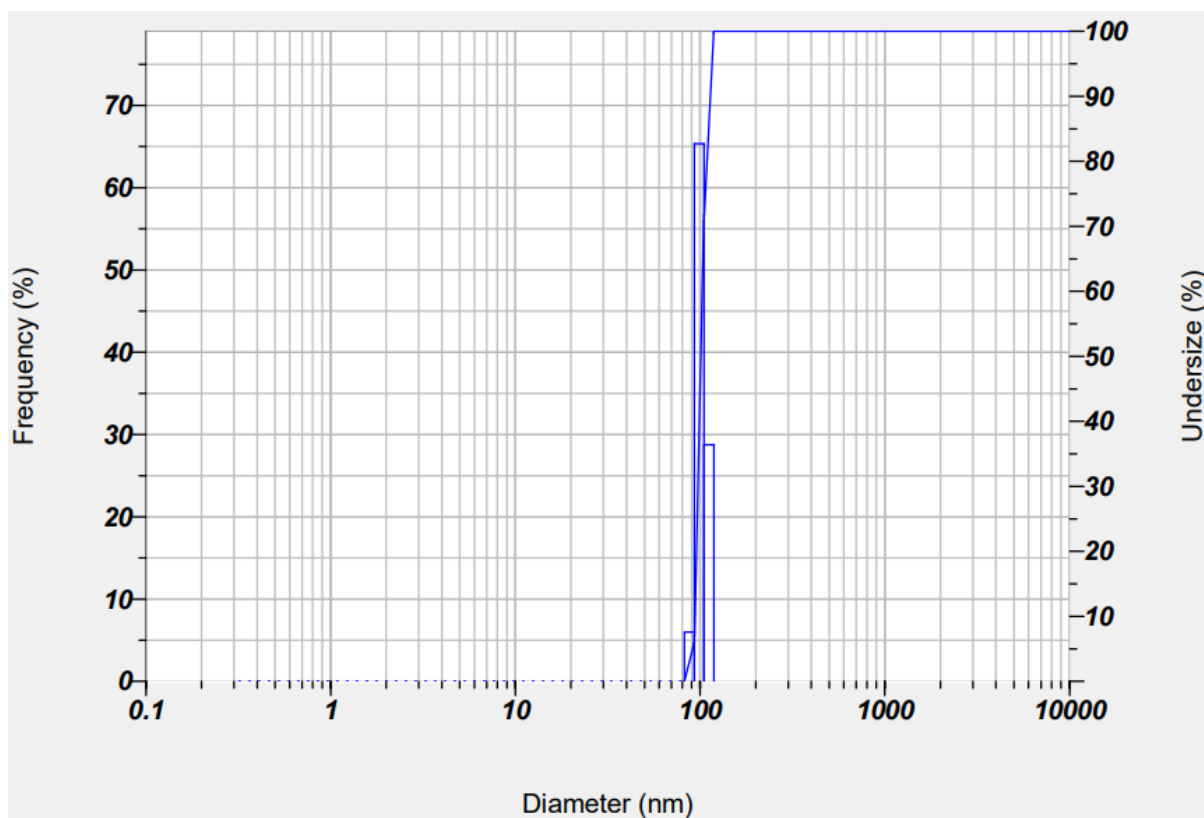

**Fig. S8.** DLS of AIEgen UFS ( $5 \times 10^{-5}$  M) containing  $\text{UO}_2^{2+}$  ( $2.5 \times 10^{-5}$  M) in DMSO containing  $f_w = 95\%$ .

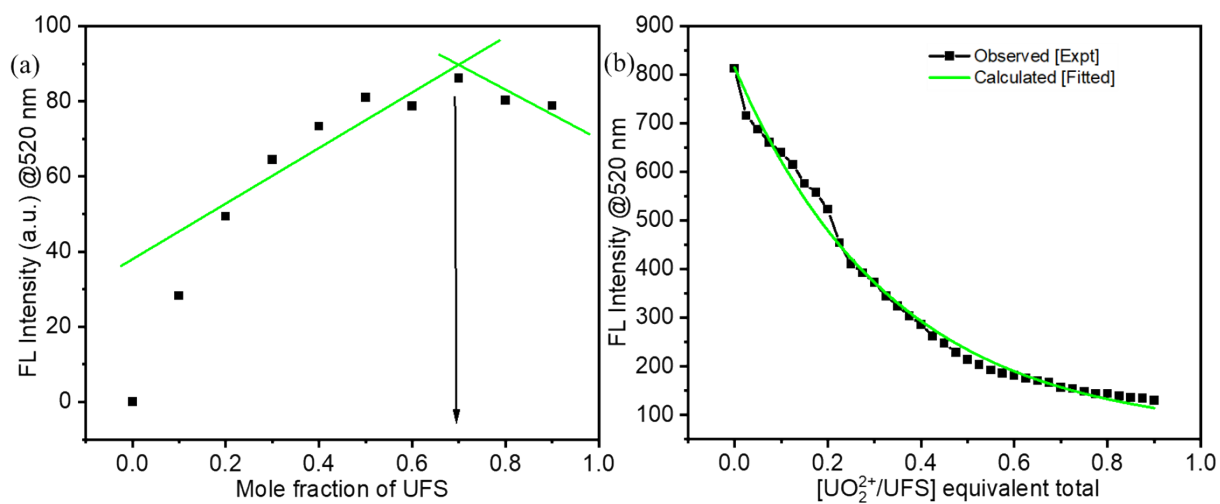

**Fig. S9.** (a) Job's plot of UFS- $\text{UO}_2^{2+}$  complex. (b) Bindfit plot for UFS- $\text{UO}_2^{2+}$  complex.

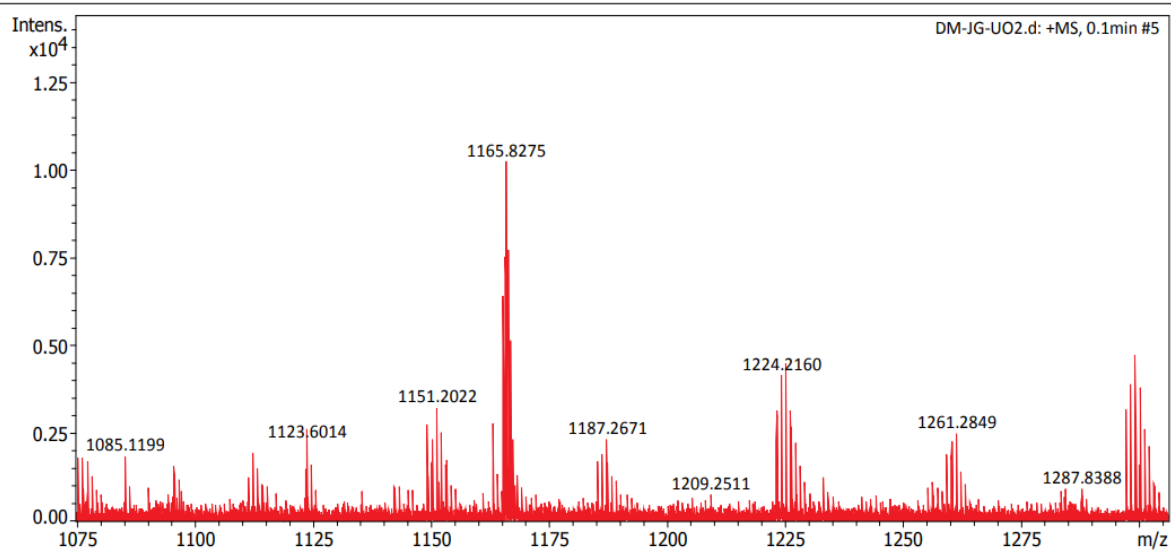

**Fig. S10.** Mass spectrum of UFS-UO<sub>2</sub><sup>2+</sup> complex.

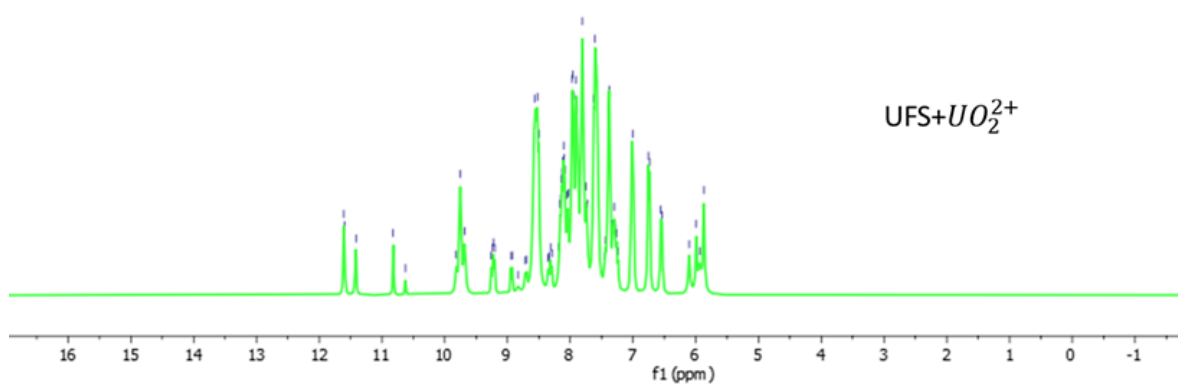

**Fig. S11.** <sup>1</sup>H NMR spectrum of UFS-UO<sub>2</sub><sup>2+</sup> complex in DMSO-*d*<sub>6</sub>.

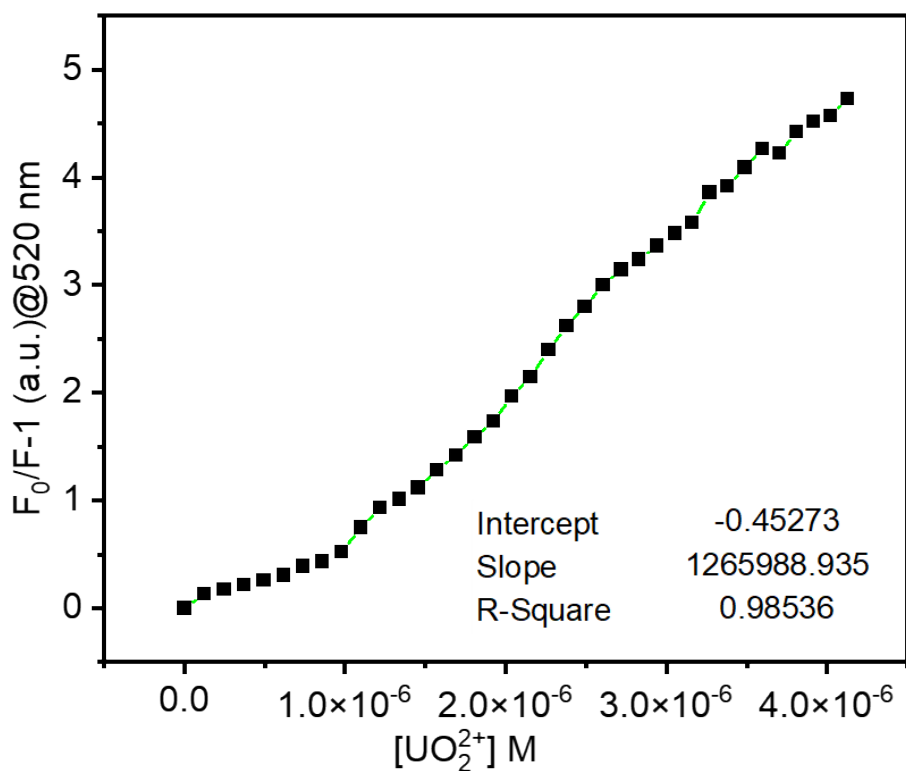

**Fig. S12.** Stern-Volmer plots of UFS-UO<sub>2</sub><sup>2+</sup> complex.

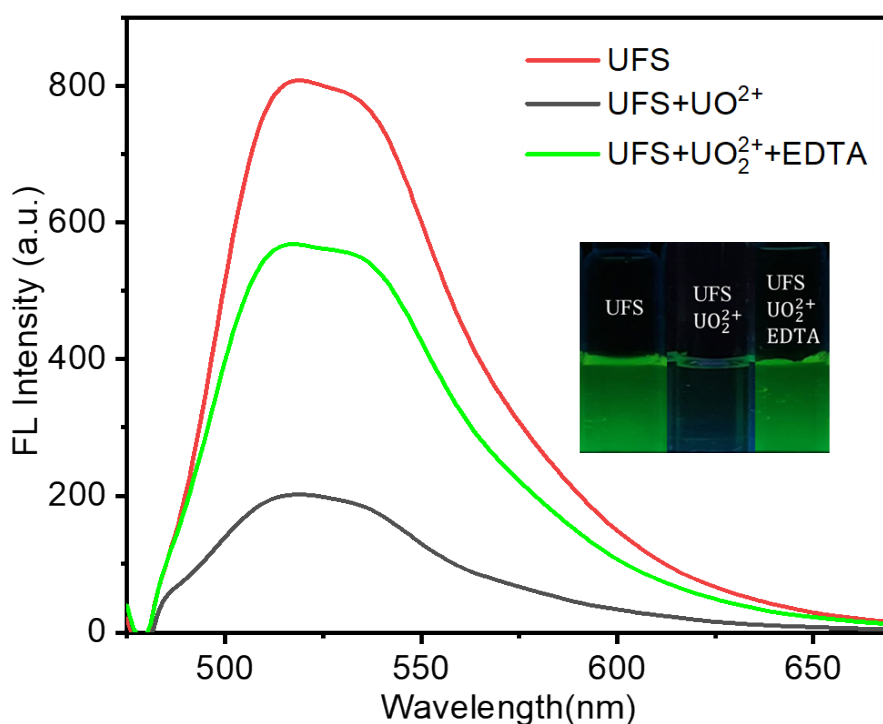

**Fig. S13.** Fluorescence spectra of AIEgen UFS ( $5 \times 10^{-5}$  M) with the addition of UO<sub>2</sub><sup>2+</sup> ions (100  $\mu$ L,  $5 \times 10^{-4}$  M) followed by the addition of EDTA (100  $\mu$ L,  $5 \times 10^{-4}$  M) in DMSO:H<sub>2</sub>O ( $f_w = 95\%$ ).

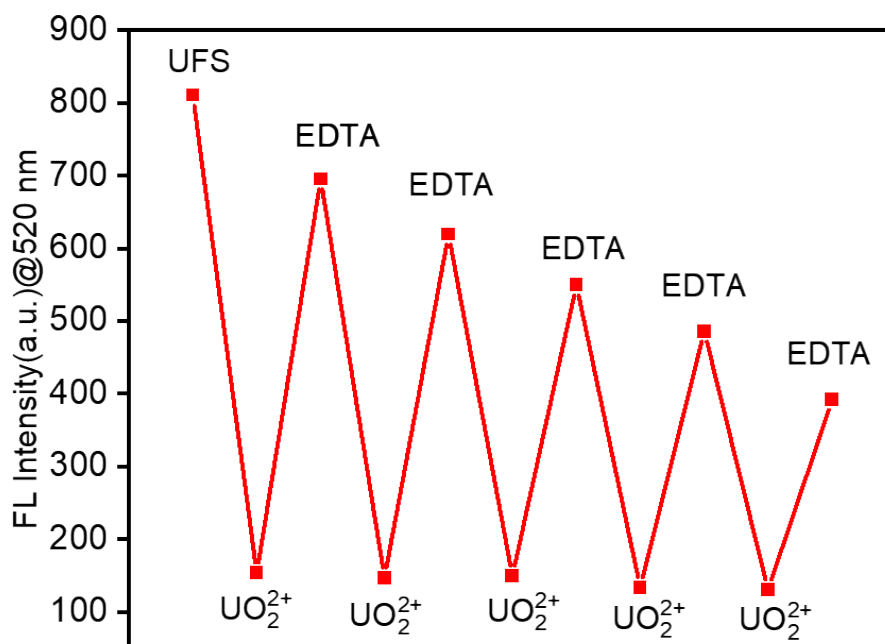

**Fig. S14.** Reversibility cycle of AIEgen UFS ( $5 \times 10^{-5}$  M) after the sequential addition of  $\text{UO}_2^{2+}$  ( $5 \times 10^{-4}$  M) and EDTA ( $5 \times 10^{-4}$  M).

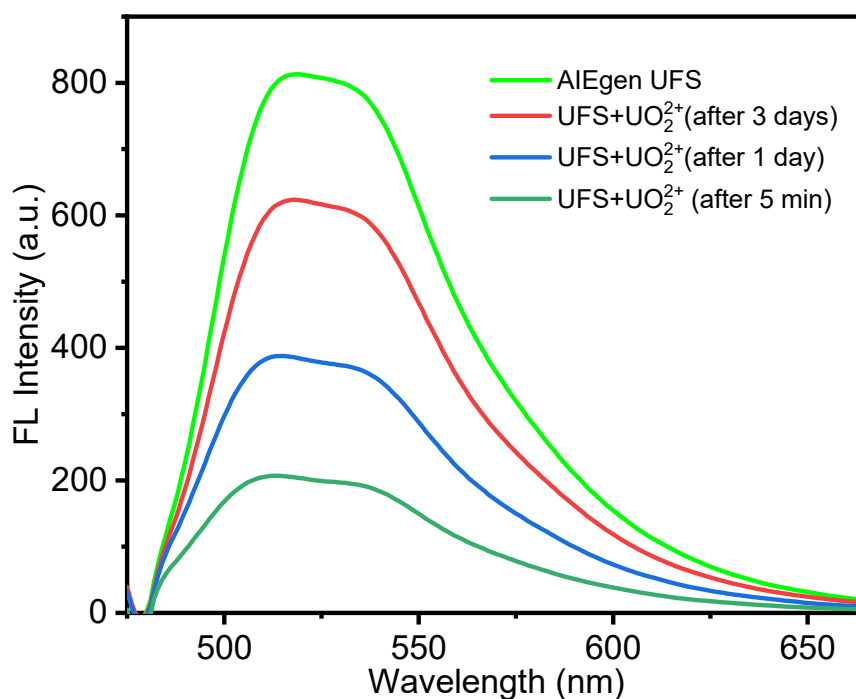

**Fig. S15.** Fluorescence spectra of AIEgen UFS (2 mL,  $5 \times 10^{-5}$  M) with the  $\text{UO}_2^{2+}$  solution (100  $\mu\text{L}$ ). The solution was taken from the 2 mL  $\text{UO}_2^{2+}$  solution ( $5 \times 10^{-4}$  M) kept with the UFS gelatin gel.



**Table S1.** Comparison of the performance between AIEgen UFS and the reported fluorescence uranyl ion probes.

| Probes                                                                              | $\lambda_{ex}$<br>/<br>nm | $\lambda_{em}$<br>/<br>nm | Detection<br>limit | Response<br>mode         | Response time<br>(min) | Ref.<br>. |
|-------------------------------------------------------------------------------------|---------------------------|---------------------------|--------------------|--------------------------|------------------------|-----------|
| 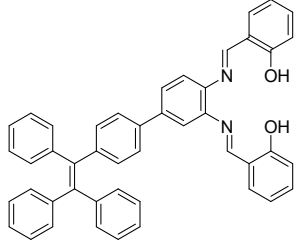   | 370                       | 548                       | 39 nM              | Fluorescence<br>turn-off | 10                     | 1         |
|    | 320                       | 522                       | 46 nM              | Fluorescence<br>turn-on  | 5                      | 2         |
|    | 740                       | 795                       | 93 nM              | Fluorescence<br>turn-off | 40                     | 3         |
|  | 340                       | 485                       | 7.9 nM             | Fluorescence<br>turn-off | 1                      | 4         |
|  | 350                       | 510                       | 500 nM             | Fluorescence<br>turn-off | 1                      | 5         |
|  | 340                       | 374                       | 41 nM              | Fluorescence<br>turn-on  | 10-15                  | 6         |
|  | 740                       | 795                       | 93 nM              | Fluorescence<br>turn-off | 40                     | 7         |
| <b>AIEgen UFS</b>                                                                   | <b>450</b>                | <b>520</b>                | <b>87.3 nM</b>     | <b>Fluorescenc</b>       | <b>Instantaneousl</b>  |           |

|  |  |  |  |            |   |  |
|--|--|--|--|------------|---|--|
|  |  |  |  | e turn-off | y |  |
|--|--|--|--|------------|---|--|

**Table S2.** Fluorescence lifetime decay parameters of AIEgen UFS in the absence and presence of  $\text{UO}_2^{2+}$  ion.

| Compounds               | $\tau_1$ (ns) | $\tau_2$ (ns) | $\tau_3$ (ns) | Avg. time (ns) |
|-------------------------|---------------|---------------|---------------|----------------|
| UFS                     | 4.12          | 8.25          | 0.16          | 4.17           |
| UFS- $\text{UO}_2^{2+}$ | 2.62          | 5.25          | 0.10          | 2.65           |

## References

1. N. Lin, W. Ren, J. Hu, B. Gao, D. Yuan, X. Wang and J. Fu, *Dyes and Pigments*, 2019, **166**, 182-188.
2. A. Elabd and O. Elhefnawy, *Journal of fluorescence*, 2016, **26**, 271-276.
3. J.-H. Zhu, X. Zhao, J. Yang, Y.-T. Tan, L. Zhang, S.-P. Liu, Z.-F. Liu and X.-L. Hu, *Spectrochimica Acta Part A: Molecular and Biomolecular Spectroscopy*, 2016, **159**, 146-150.
4. Y. Zhan, X. Lu, T. Lan, Q. Tian, J. Shen and W. He, *Dyes and Pigments*, 2023, **216**, 111299.
5. M. Zheng, Q. Yin, D. Wang, Z. Zhao, Q. Hu and H. Wang, *Microchemical Journal*, 2021, **167**, 106302.
6. A. Elabd and M. Attia, *Journal of Luminescence*, 2015, **165**, 179-184.
7. Y. Zhang, L. Sun, Q. Yan, X. Qiu, Y. Cheng, B. Wang, X. Tan, M. Fang, R. L. Luck and H. Liu, *Microchemical Journal*, 2022, **180**, 107619.

\*\*\*\*\*
